# Supplementary material for: Solutocapillary transport of oxygen bubbles in a diffusion-bubbling membrane core
Source: Royal Society of Chemistry journal article supplement (doi:10.1039/d3cp04683d), 2024-01-01
Supplement: d3cp04683d1.pdf [file d3cp04683d1.pdf]

## Solutocapillary Transport of Oxygen Bubbles in Diffusion-Bubbling Membrane Core

Valery V. Belousov\* and Sergey V. Fedorov

Baikov Institute of Metallurgy and Materials Science, Russian Academy of Sciences, 49 Leninskii

Pr., 119334 Moscow, Russian Federation; E-mail: [vbelousov@imet.ac.ru](mailto:vbelousov@imet.ac.ru)

### Reactor

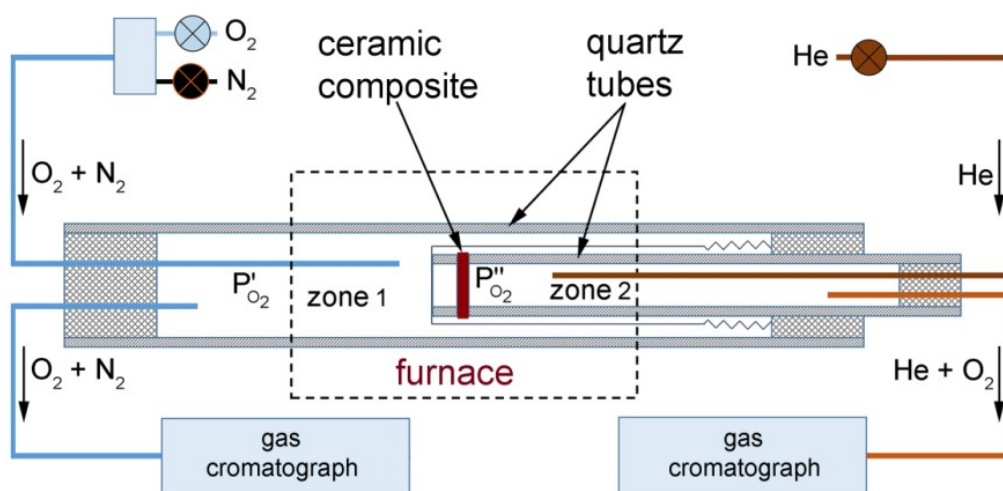

**Figure S1.** Schematic of experimental facility for thermal treatment of initial CuO - 25 wt %  $Cu_5V_2O_{10}$  ceramic composite at 830 °C under an oxygen partial pressure difference [1].

### Bubble size distribution and bubble density

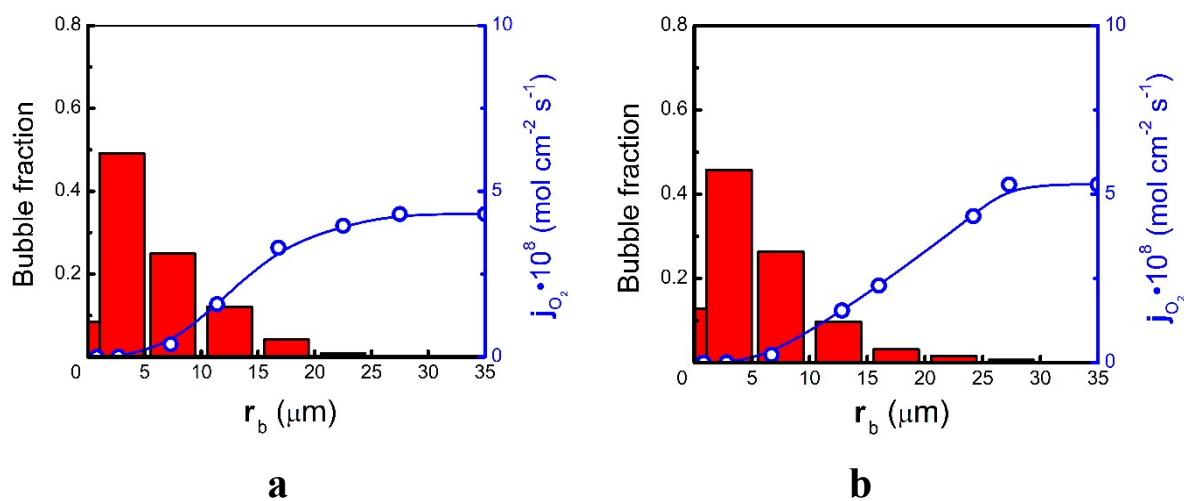

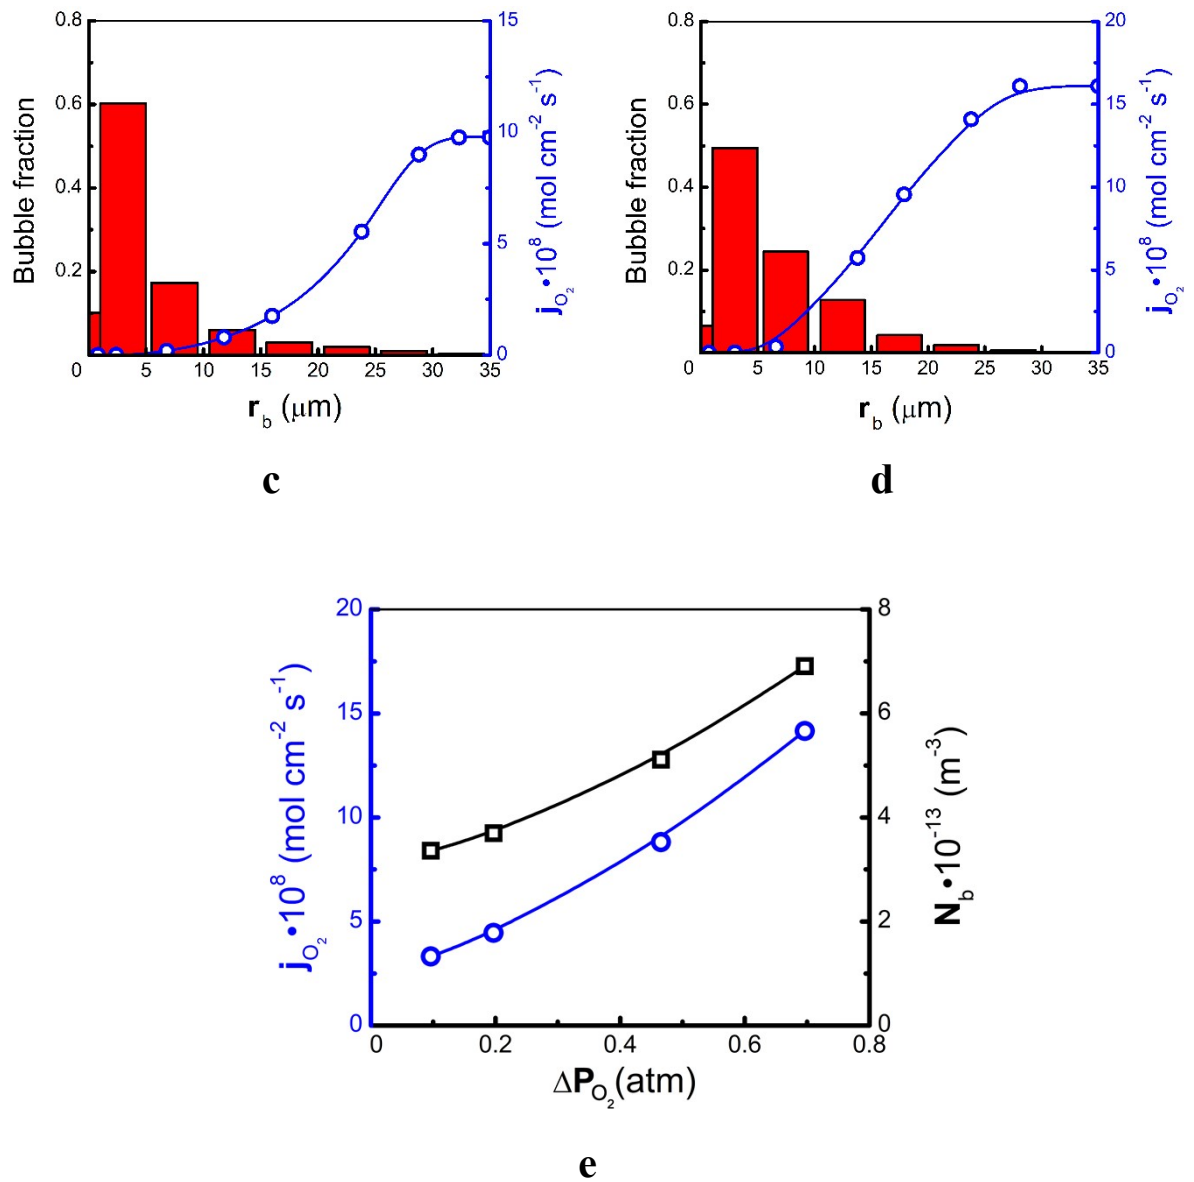

**Figure S2.** (a) – (d) Bubble size distribution in the core of  $\text{CuO} - 25 \text{ wt}\% \text{ Cu}_5\text{V}_2\text{O}_{10}$  DBM and cumulative oxygen flux through this membrane: (a)  $\ln(P_{\text{O}_2}^{\text{I}}/P_{\text{O}_2}^{\text{II}}) = 2.04$ , (b)  $\ln(P_{\text{O}_2}^{\text{I}}/P_{\text{O}_2}^{\text{II}}) = 2.35$ , (c)  $\ln(P_{\text{O}_2}^{\text{I}}/P_{\text{O}_2}^{\text{II}}) = 2.72$ , and (d)  $\ln(P_{\text{O}_2}^{\text{I}}/P_{\text{O}_2}^{\text{II}}) = 2.91$  [2]. (e) Bubble density in the core of the DBM vs oxygen partial pressure difference across the membrane [2].

## Viscosity

**Table S1.** Measured viscosities in  $\text{Cu}_2\text{O}$  melts in equilibrium with Cu [3].

| First measurement C8 |                 | Second measurement C14 |                 |
|----------------------|-----------------|------------------------|-----------------|
| Temperature/ K       | Viscosity/ Pa s | Temperature/ K         | Viscosity/ Pa s |
| 1588                 | 0.0109          | 1588                   | 0.0098          |
| 1573                 | 0.0117          | 1573                   | 0.0101          |
| 1548                 | 0.0123          | 1548                   | 0.0110          |
| 1523                 | 0.0141          | 1523                   | 0.0137          |
| 1513                 | 0.0147          |                        |                 |

## Oxygen adsorption

The parameter  $\Gamma = \Gamma_1 - \Gamma_2$ , where  $\Gamma_1$  and  $\Gamma_2$  are the adsorption of oxygen at opposite poles of the bubble, was estimated for the DBM operating temperature (830 °C) at different oxygen partial pressure  $P_{O_2}'$  and  $P_{O_2}''$  by extrapolation of the data presented in Fig. S3 using the Box Lucas model (<https://www.originlab.com/doc/Origin-Help/BoxLucas1-FitFunc>) in OriginPro 8:

$$\Gamma_i = a \left( 1 - e^{-\frac{b10^3}{T}} \right), \text{ where } i = 1, 2 \text{ and } a \text{ and } b \text{ are the fitting factors (Table S2).}$$

**Table S2.**

| $P_{O_2}'$ | $a \times 10^{16}$ | b        | $\Gamma_1 \times 10^4$<br>mol m <sup>-2</sup> | $P_{O_2}''$ | $a \times 10^{17}$ | b        | $\Gamma_2 \times 10^4$<br>mol m <sup>-2</sup> | $\Gamma \times 10^5$<br>mol m <sup>-2</sup> |
|------------|--------------------|----------|-----------------------------------------------|-------------|--------------------|----------|-----------------------------------------------|---------------------------------------------|
| 0.10       | -1.13              | -31.3811 | 2.25                                          | 0.013       | -6.22              | -31.9194 | 2.02                                          | 2.27                                        |
| 0.21       | -1.39              | -31.1869 | 2.34                                          | 0.020       | -7.06              | -31.8052 | 2.07                                          | 2.71                                        |
| 0.50       | -1.79              | -30.9609 | 2.45                                          | 0.033       | -8.16              | -31.6728 | 2.12                                          | 3.25                                        |
| 0.75       | -2.01              | -30.8557 | 2.50                                          | 0.041       | -8.69              | -31.6155 | 2.14                                          | 3.54                                        |

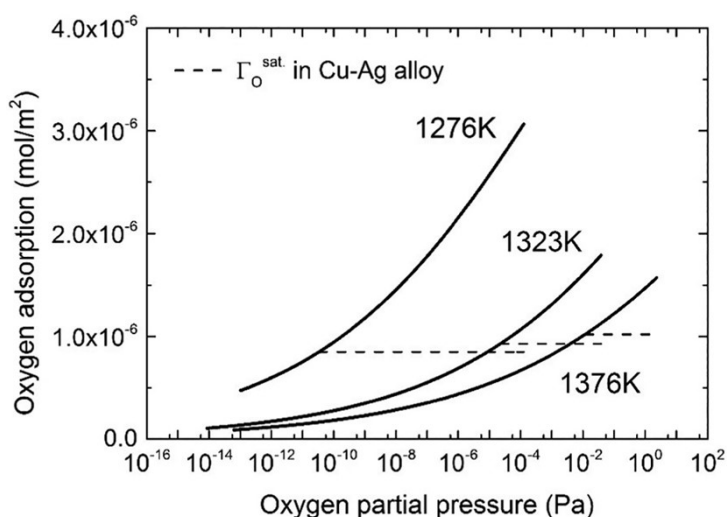

**Figure S3.** Oxygen adsorption on the surface of Ag<sub>40</sub>Cu (in at.%) alloy at 1276, 1323 and 1376 K. (Dashed line: theoretically calculated oxygen adsorption at saturation on the Cu sites) [4].

## References

1. S. V. Fedorov, A. A. Klimashin and V. V. Belousov, A Core-Shell Structured Diffusion-Bubbling Membrane for Efficient Oxygen Separation: Formation and Transport Properties, *J. Am. Ceram. Soc.*, 2022, **105**, 4532–4541.
2. V. V. Belousov and S. V. Fedorov, Bubble Nucleation in Core-Shell Structured Molten Oxide-Based Membranes with Combined Diffusion-Bubbling Oxygen Mass Transfer: Experiment and Theory, *Phys. Chem. Chem. Phys.*, 2021, **23**, 24029–24038.
3. M. Chen, B. Zhao and E. Jak, Viscosity measurements of high “Cu<sub>2</sub>O” containing slags in the “Cu<sub>2</sub>O”-SiO<sub>2</sub>-Al<sub>2</sub>O<sub>3</sub> system in equilibrium with metallic Cu, Proceedings of the Ninth International Conference on Molten Slags, Fluxes and Salts (MOLTEN12), 2012, Beijing, May 27th – 30<sup>th</sup>, China: The Chinese Society for Metals, W082-12.
4. Y. Kang, J. Brillo, J. Han, H. G. Kim, D. Giuranno, R. Novakovic, E. Ricci, E. Arato and J. Lee, Oxygen Adsorption of Molten Ag/Cu Eutectic Alloy and Its Associated Surface Modification, *J. Molecul. Liquids*, 2020, 319, 114294.
